# Supplementary material for: ST14 interacts with TMEFF1 and is a predictor of poor prognosis in ovarian cancer
Source: Springer Nature journal article supplement (doi:10.1186/s12885-024-11958-8), 2024-03-11

Figure 1G  
ST14

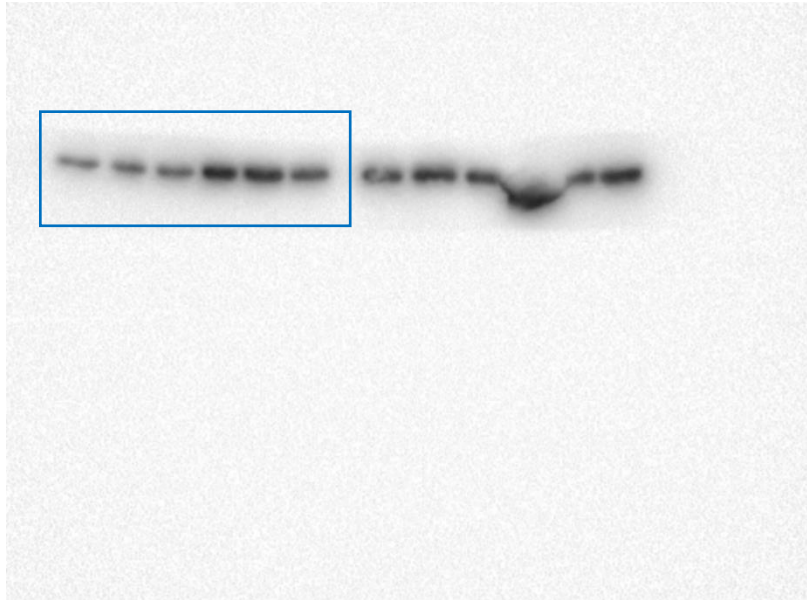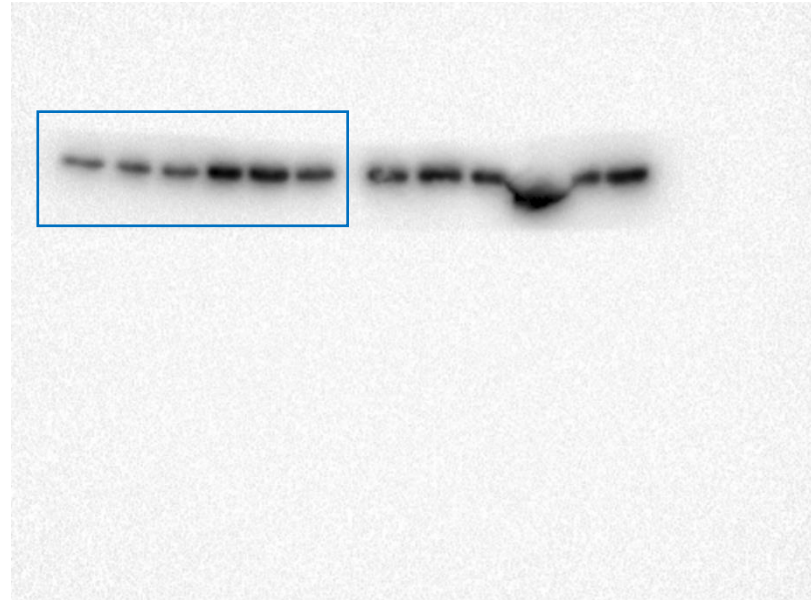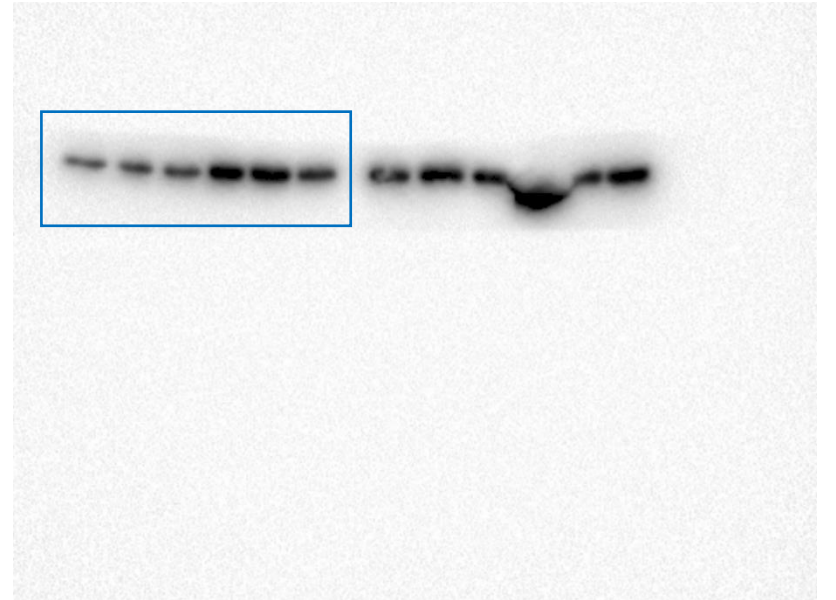

Figure 1G  
TMEFF1

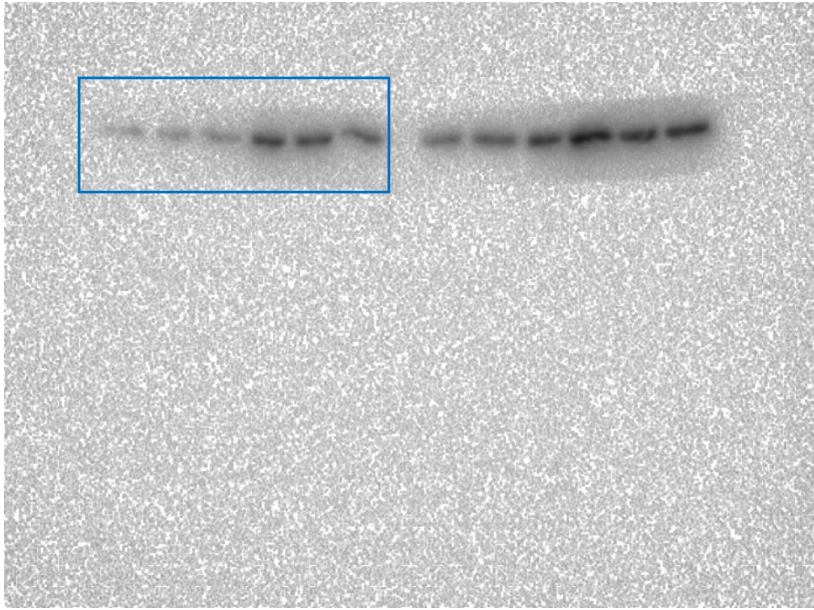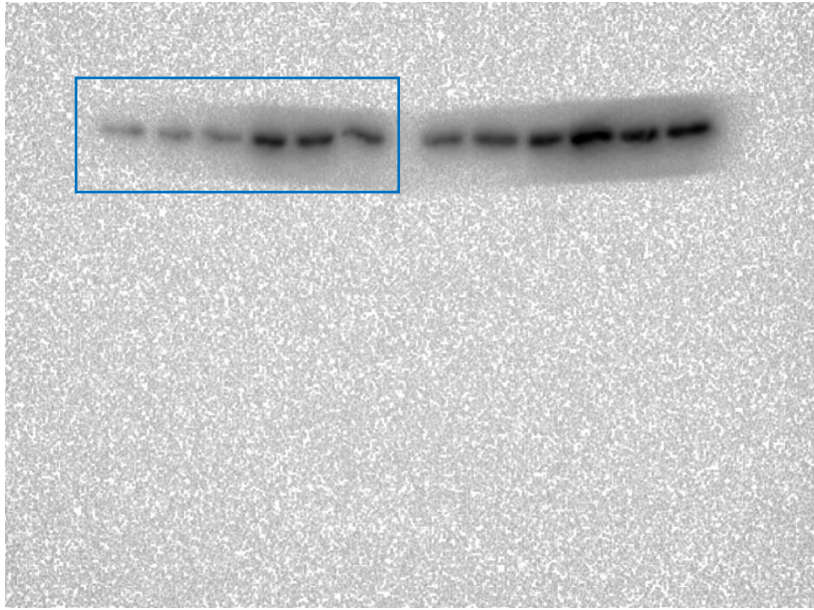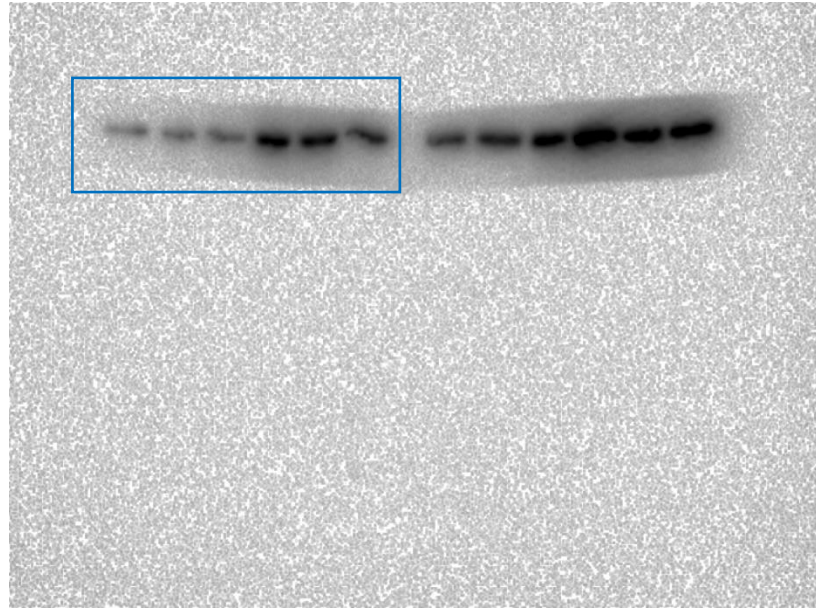

Figure 1G  
GAPDH

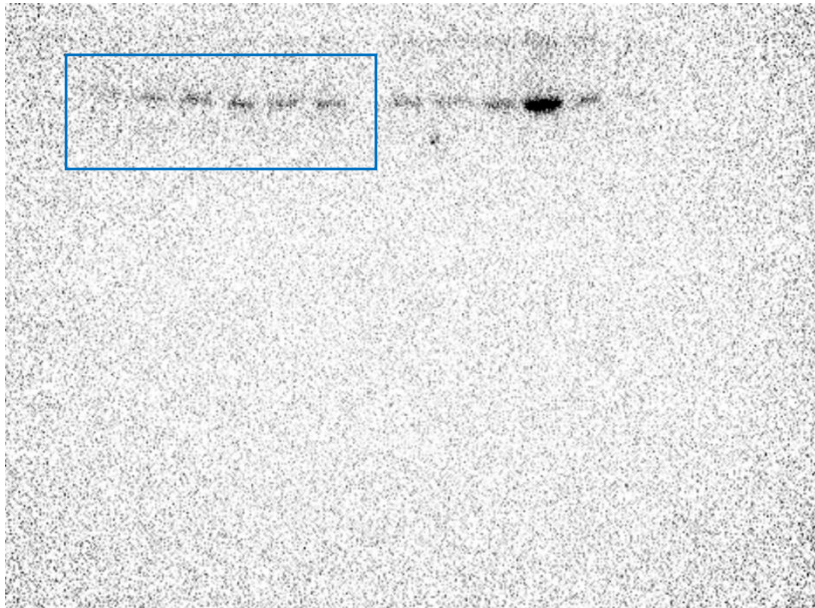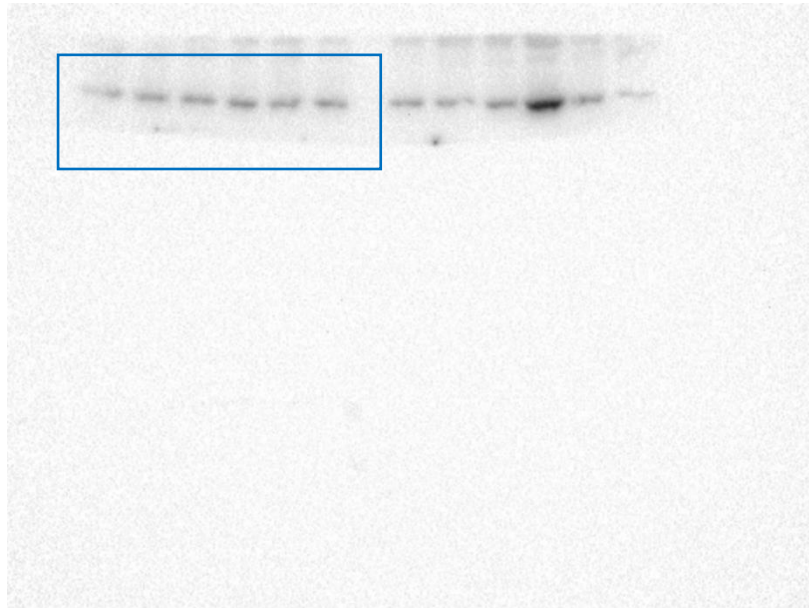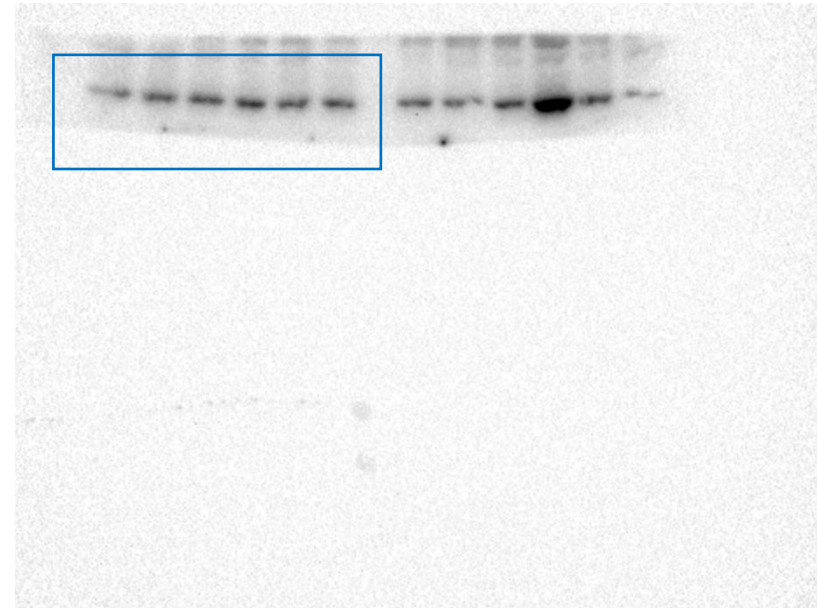

Figure 7B  
IP-TMEFF1  
ST14

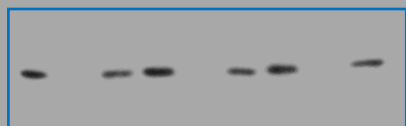

Figure 7B  
IP-TMEFF1  
TMEFF1

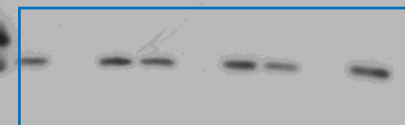

Figure 7C  
IP-ST14  
TMEFF1

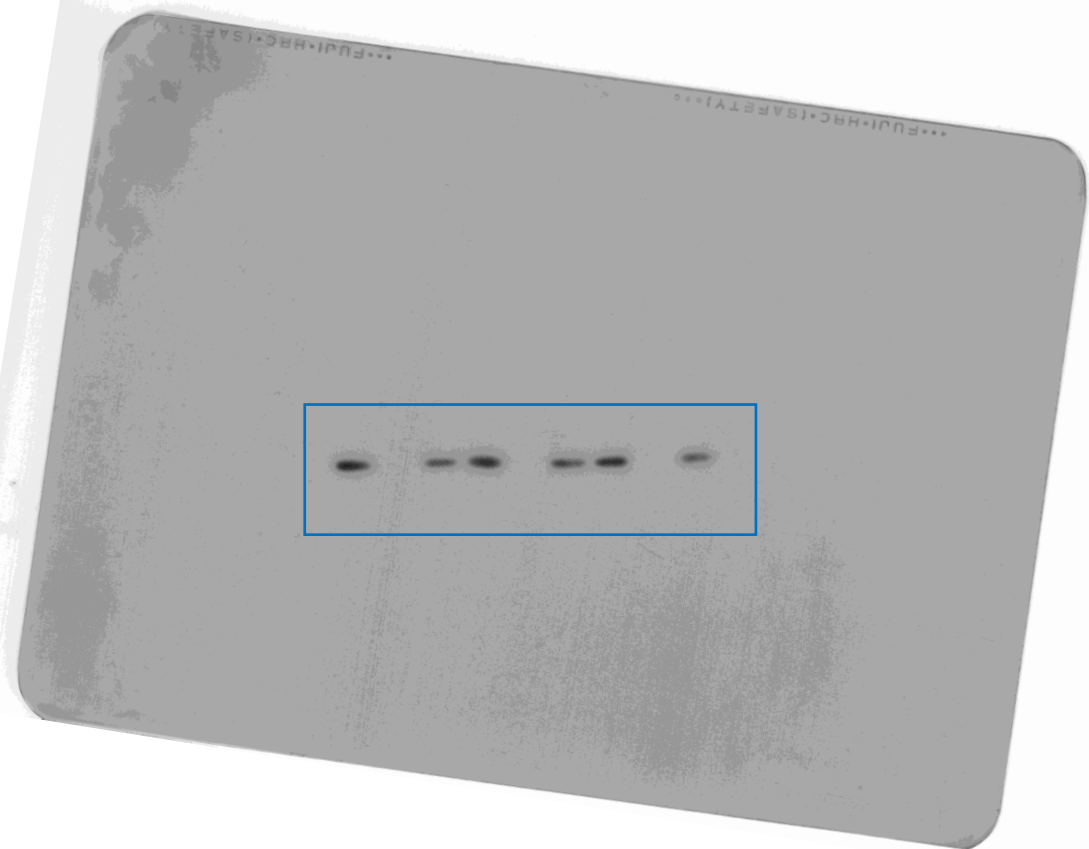

Figure 7C  
IP-ST14  
ST14

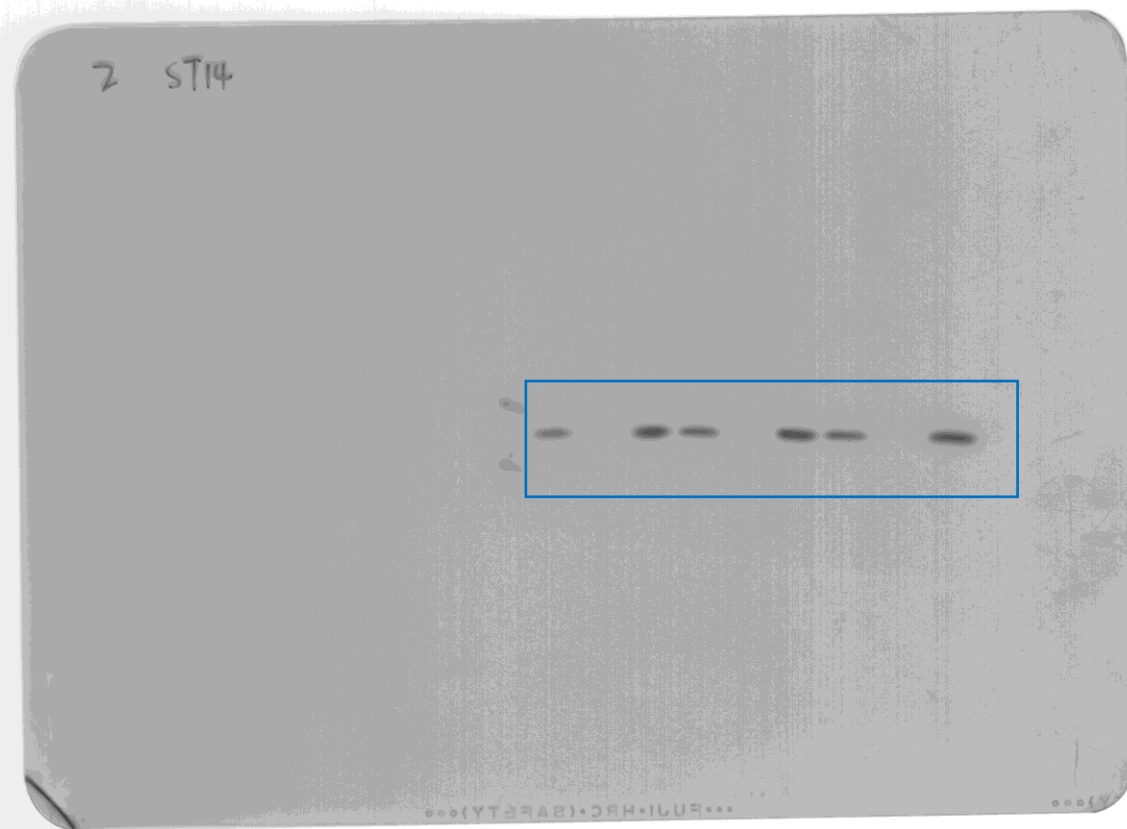

Figure 7D  
CAOV3-ST14

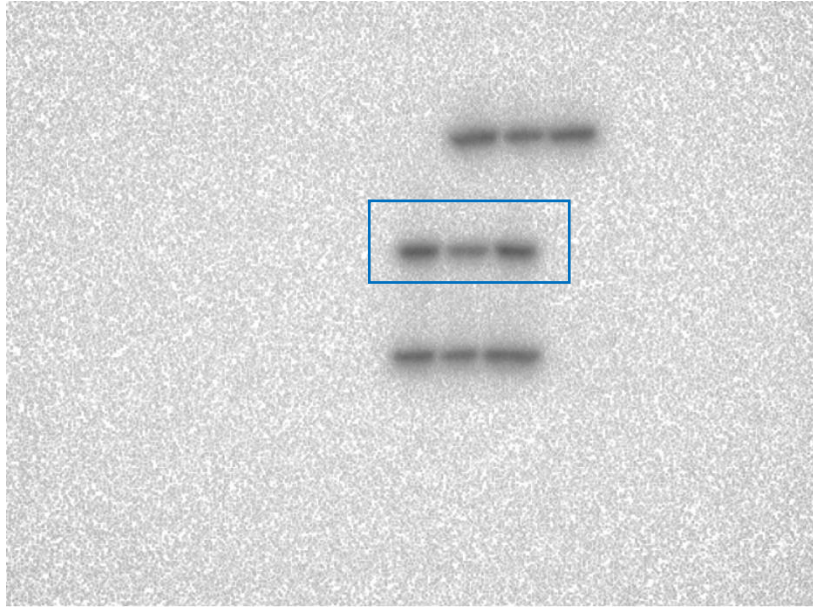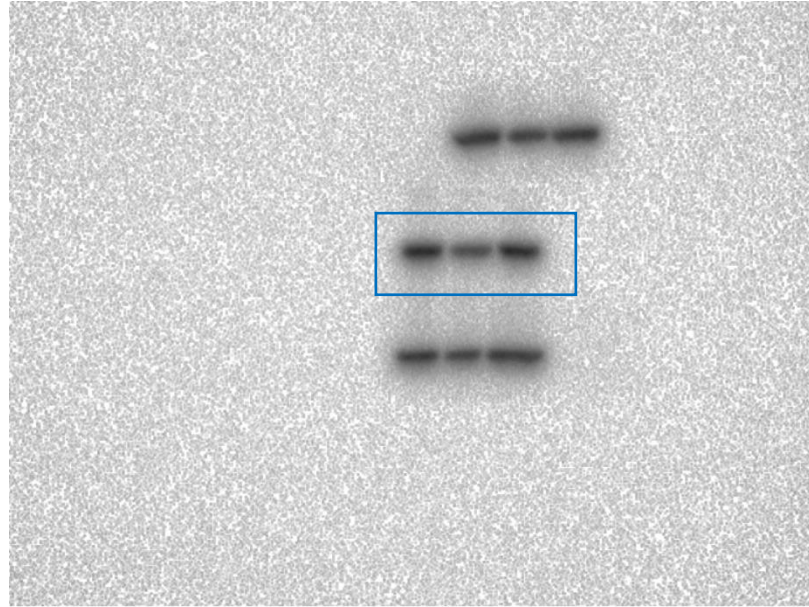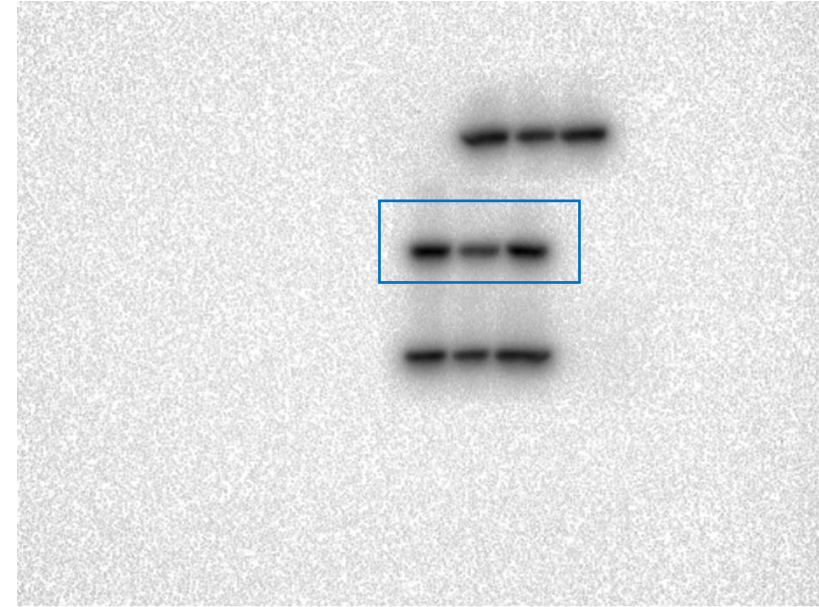

Figure 7D  
CAOV3-TMEFF1

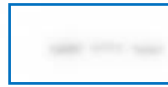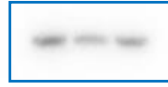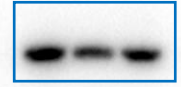

Figure 7D  
CAOV3-GAPDH

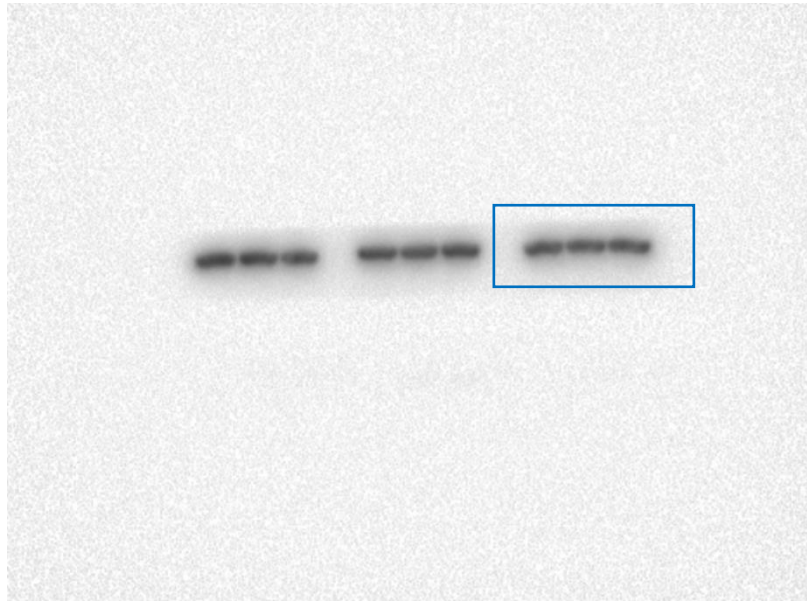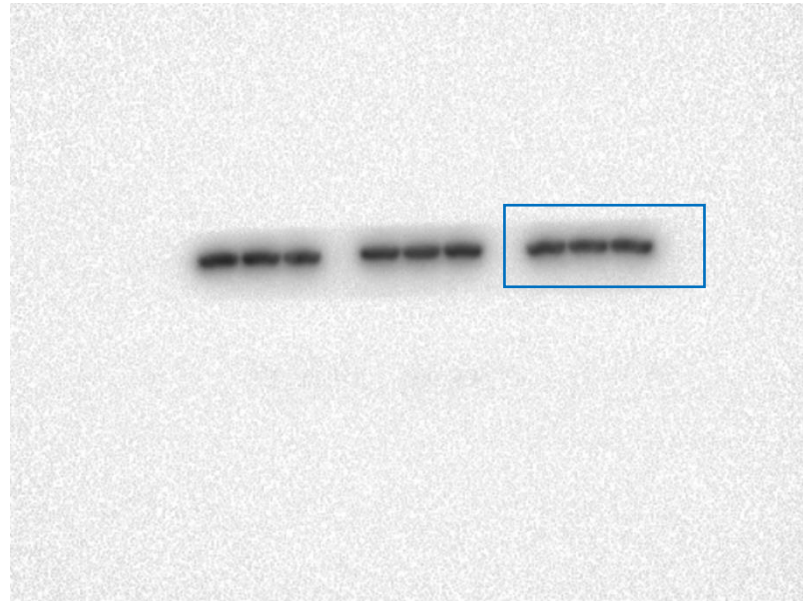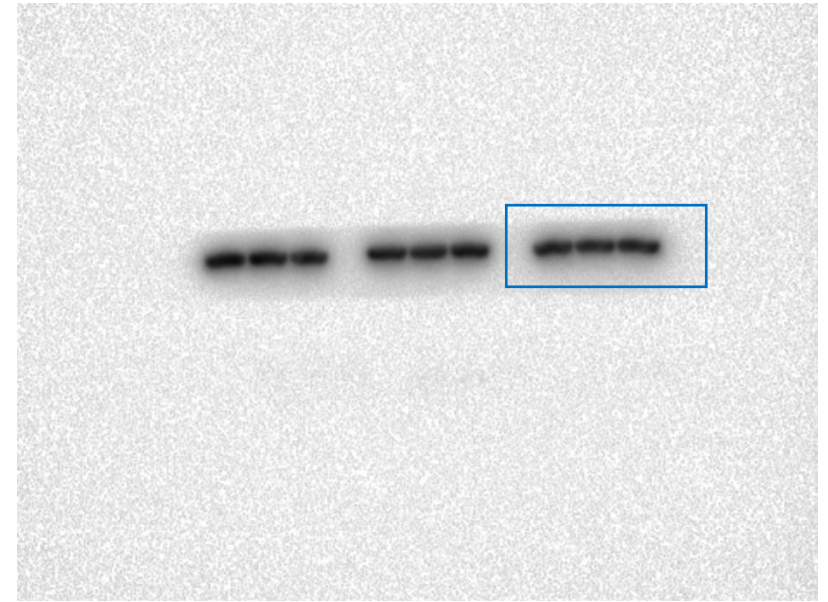



Figure 7D  
SKOV3-ST14

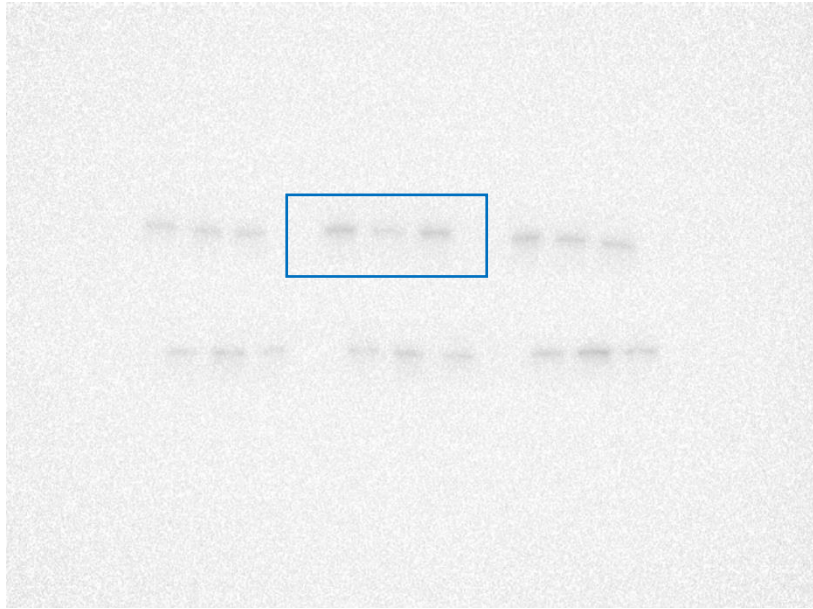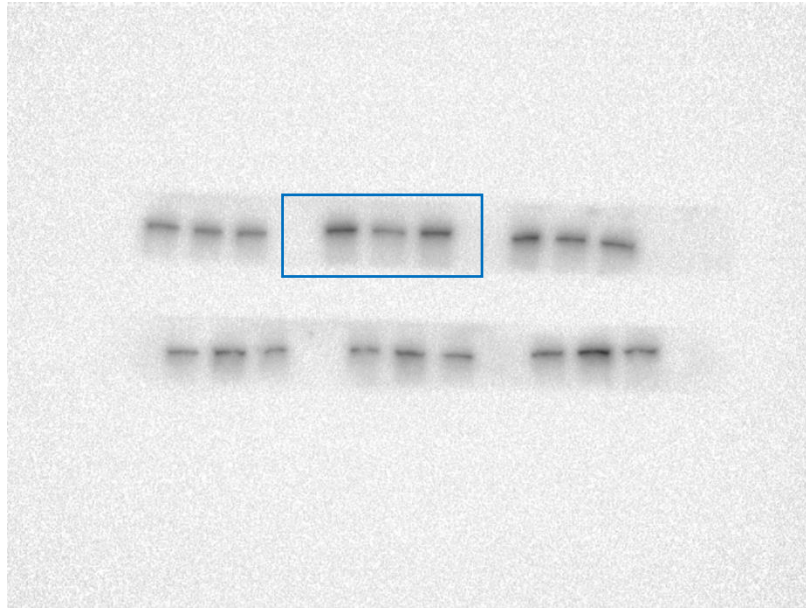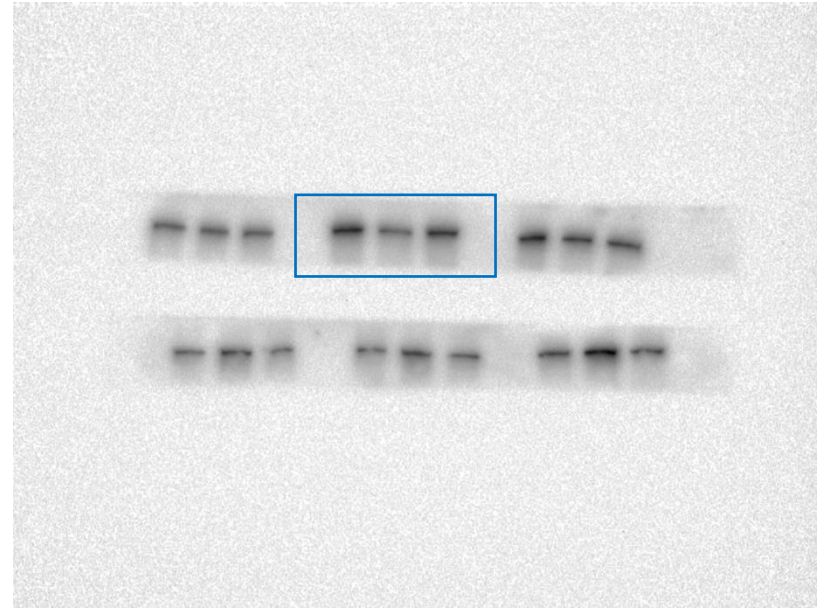

Figure 7D  
SKOV3-TMEFF1

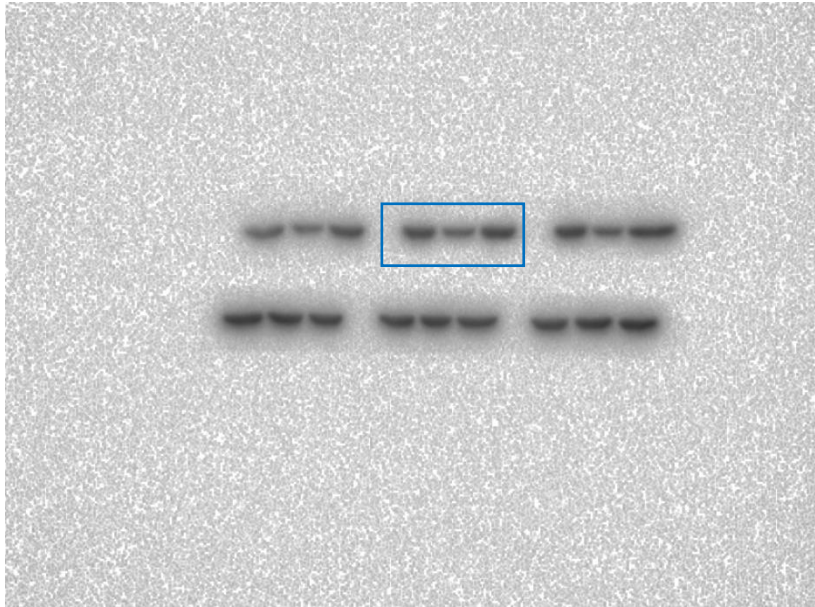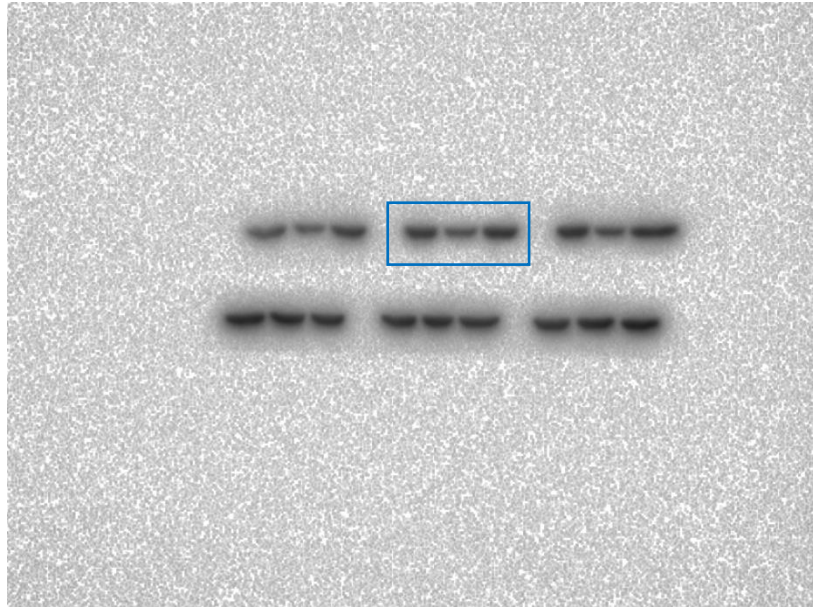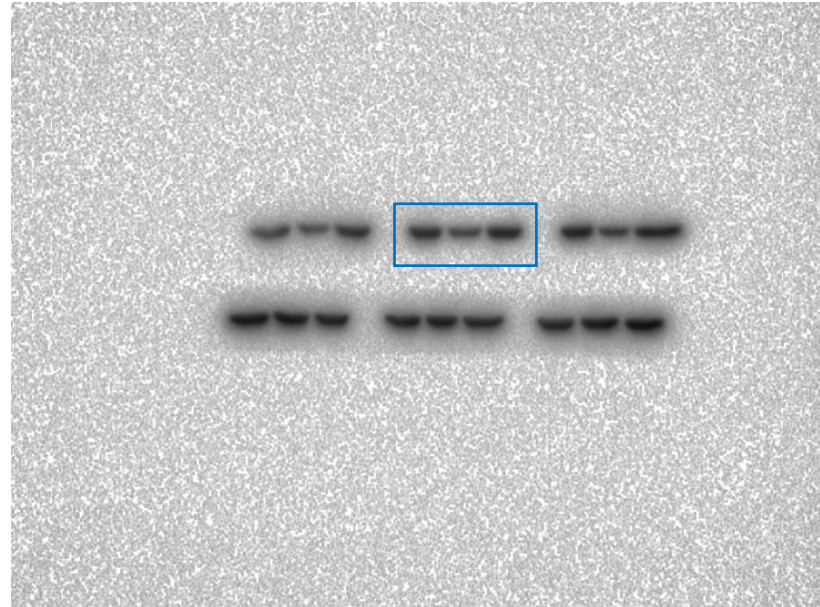

Figure 7D  
SKOV3-GAPDH

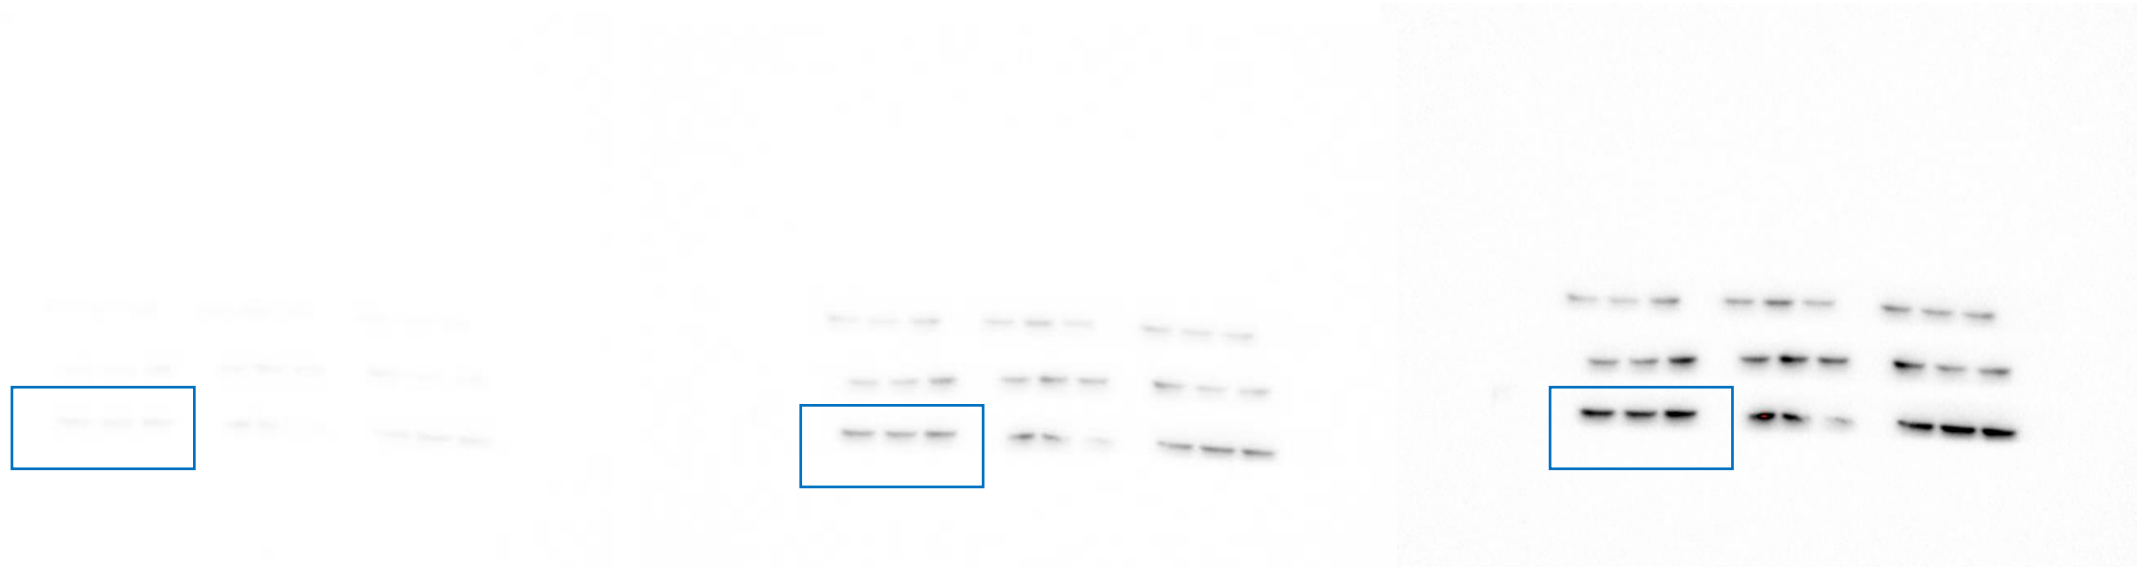

Supplement: MOESM5 [file 26840522]
